# Supplementary material for: Effect of side chain length on the charge transport, morphology, and photovoltaic performance of conjugated polymers in bulk heterojunction solar cells
Source: Royal Society of Chemistry journal article supplement (doi:10.1039/c5ta09483f), 2016-01-01
Supplement: c5ta09483f1.pdf [file c5ta09483f1.pdf]

## Electronic Supplementary Information

### Effect of side chain length on charge transport, morphology, and photovoltaic performance of conjugated polymers in bulk heterojunction solar cells

Chunhui Duan, Robin E. M. Willems, Jacobus J. van Franeker, Bardo J. Bruijnaers, Martijn M. Wienk, and René A. J. Janssen\*

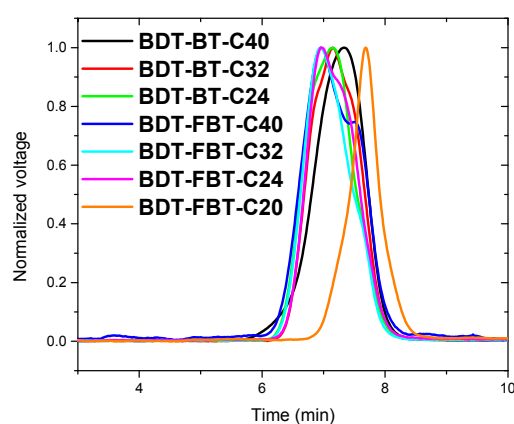

**Fig. S1** GPC traces of the BDT-BT- $C_n$  polymers and BDT-FBT- $C_n$  polymers with *o*-DCB as eluent at 140 °C.

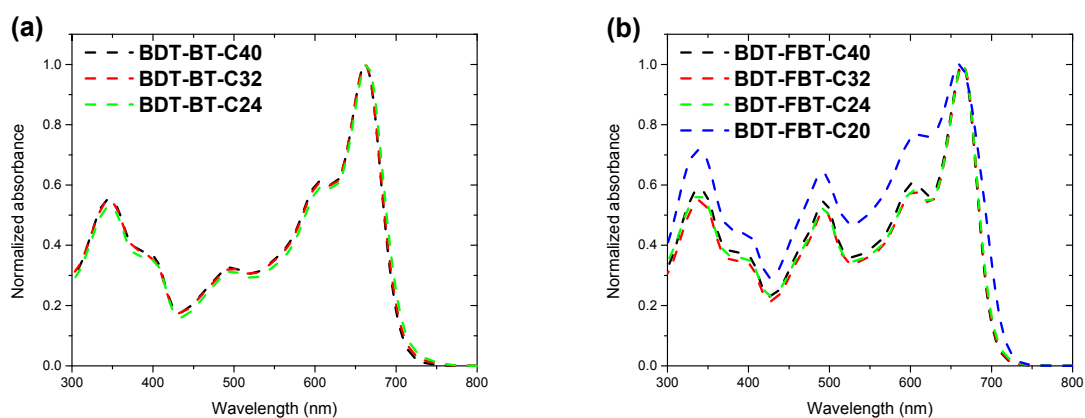

**Fig. S2** UV-vis absorption spectra of (a) BDT-BT-C40, BDT-BT-C32, BDT-BT-C24, and (b) BDT-FBT-C40, BDT-FBT-C32, BDT-FBT-C24, BDT-FBT-C20 in *o*-DCB solutions with concentration of 0.05 mL<sup>-1</sup>.

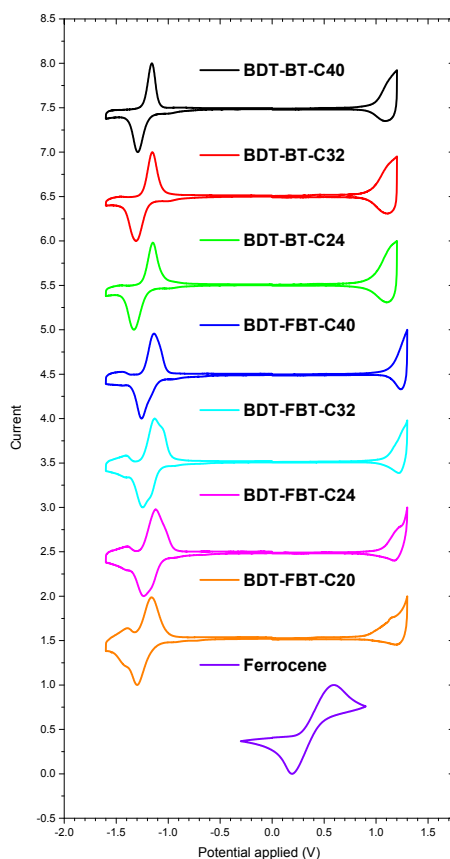

**Fig. S3** Cyclic voltammograms of BDT-BT-C40, BDT-BT-C32, BDT-BT-C24, BDT-FBT-C40, BDT-FBT-C32, BDT-FBT-C24, BDT-FBT-C20, and ferrocene measured in acetonitrile.

**Table S1** Performances of the solar cells based on BDT-FBT-C24 fabricated from different conditions under AM1.5G illumination ( $100 \text{ mW cm}^{-2}$ ). The device structure is ITO/PEDOT:PSS/active layer/ECL/Al.

| ECL | Acceptor | D:A   | Solvent       | Annealing      | $J_{sc}$<br>( $\text{mA cm}^{-2}$ ) | $V_{oc}$<br>(V) | FF   | PCE<br>(%) |      |     |
|-----|----------|-------|---------------|----------------|-------------------------------------|-----------------|------|------------|------|-----|
| LiF | [60]PCBM | 1:1.5 | <i>o</i> -DCB | -              | 6.9                                 | 0.99            | 0.51 | 3.5        |      |     |
|     |          |       | CB            | -              | 7.4                                 | 0.89            | 0.55 | 3.7        |      |     |
|     |          | 1:2   | CB            | 100 °C, 10 min | -                                   | 7.2             | 0.99 | 0.58       | 4.1  |     |
|     |          |       |               |                | -                                   | 7.6             | 0.97 | 0.50       | 3.7  |     |
|     |          | 1:2.5 | CB            | -              | CB (2% CN)                          | -               | 7.6  | 0.97       | 0.58 | 4.3 |
|     |          |       |               |                | CB                                  | -               | 6.2  | 0.98       | 0.61 | 3.7 |
|     | [70]PCBM | 1:2   | CB            | -              | 6.0                                 | 0.96            | 0.54 | 3.1        |      |     |
| PFN | [60]PCBM | 1:2   | CB            | -              | 8.4                                 | 0.99            | 0.62 | 5.1        |      |     |
|     |          |       | CB (2.5% DIO) | -              | 8.3                                 | 0.95            | 0.57 | 4.5        |      |     |

**Table S2** Performances of the solar cells processed from CB (2.5% DIO) under AM1.5G illumination ( $100 \text{ mW cm}^{-2}$ ). The device structure is ITO/PEDOT:PSS/active layer/ECL/Al.

| Polymer     | ECL | $J_{sc}$ ( $\text{mA cm}^{-2}$ ) | $V_{oc}$ (V) | FF   | PCE (%) |
|-------------|-----|----------------------------------|--------------|------|---------|
| BDT-BT-C40  | PFN | 4.8                              | 0.90         | 0.42 | 1.8     |
| BDT-BT-C32  |     | 7.2                              | 0.89         | 0.57 | 3.7     |
| BDT-BT-C24  |     | 10.9                             | 0.87         | 0.64 | 6.1     |
| BDT-FBT-C40 |     | 6.7                              | 0.93         | 0.61 | 3.8     |
| BDT-FBT-C32 |     | 6.9                              | 0.94         | 0.56 | 3.6     |
| BDT-FBT-C24 |     | 8.3                              | 0.95         | 0.57 | 4.5     |
| BDT-FBT-C20 | LiF | 5.3                              | 0.93         | 0.51 | 2.5     |

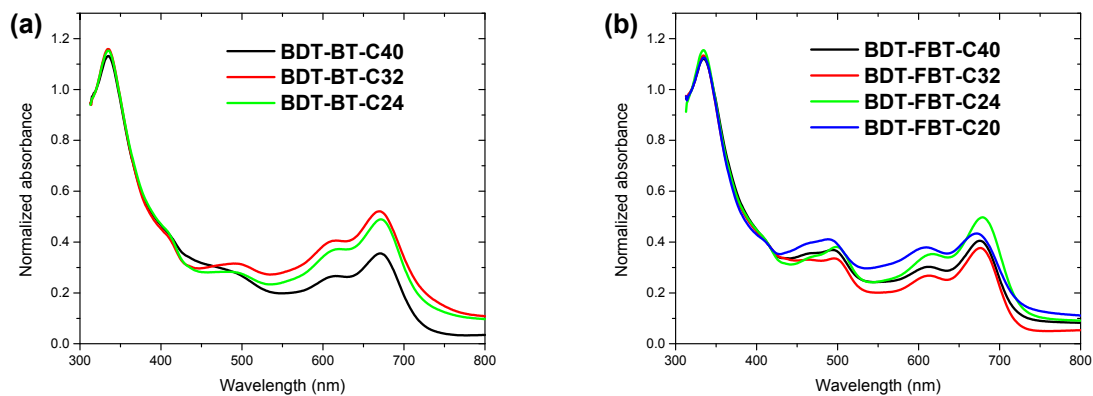

**Fig. S4** UV-vis absorption spectra of the polymer:[60]PCBM blends (i.e., the active layers) on glass substrates. The spectra are normalized to [60]PCBM peak at 320 nm.

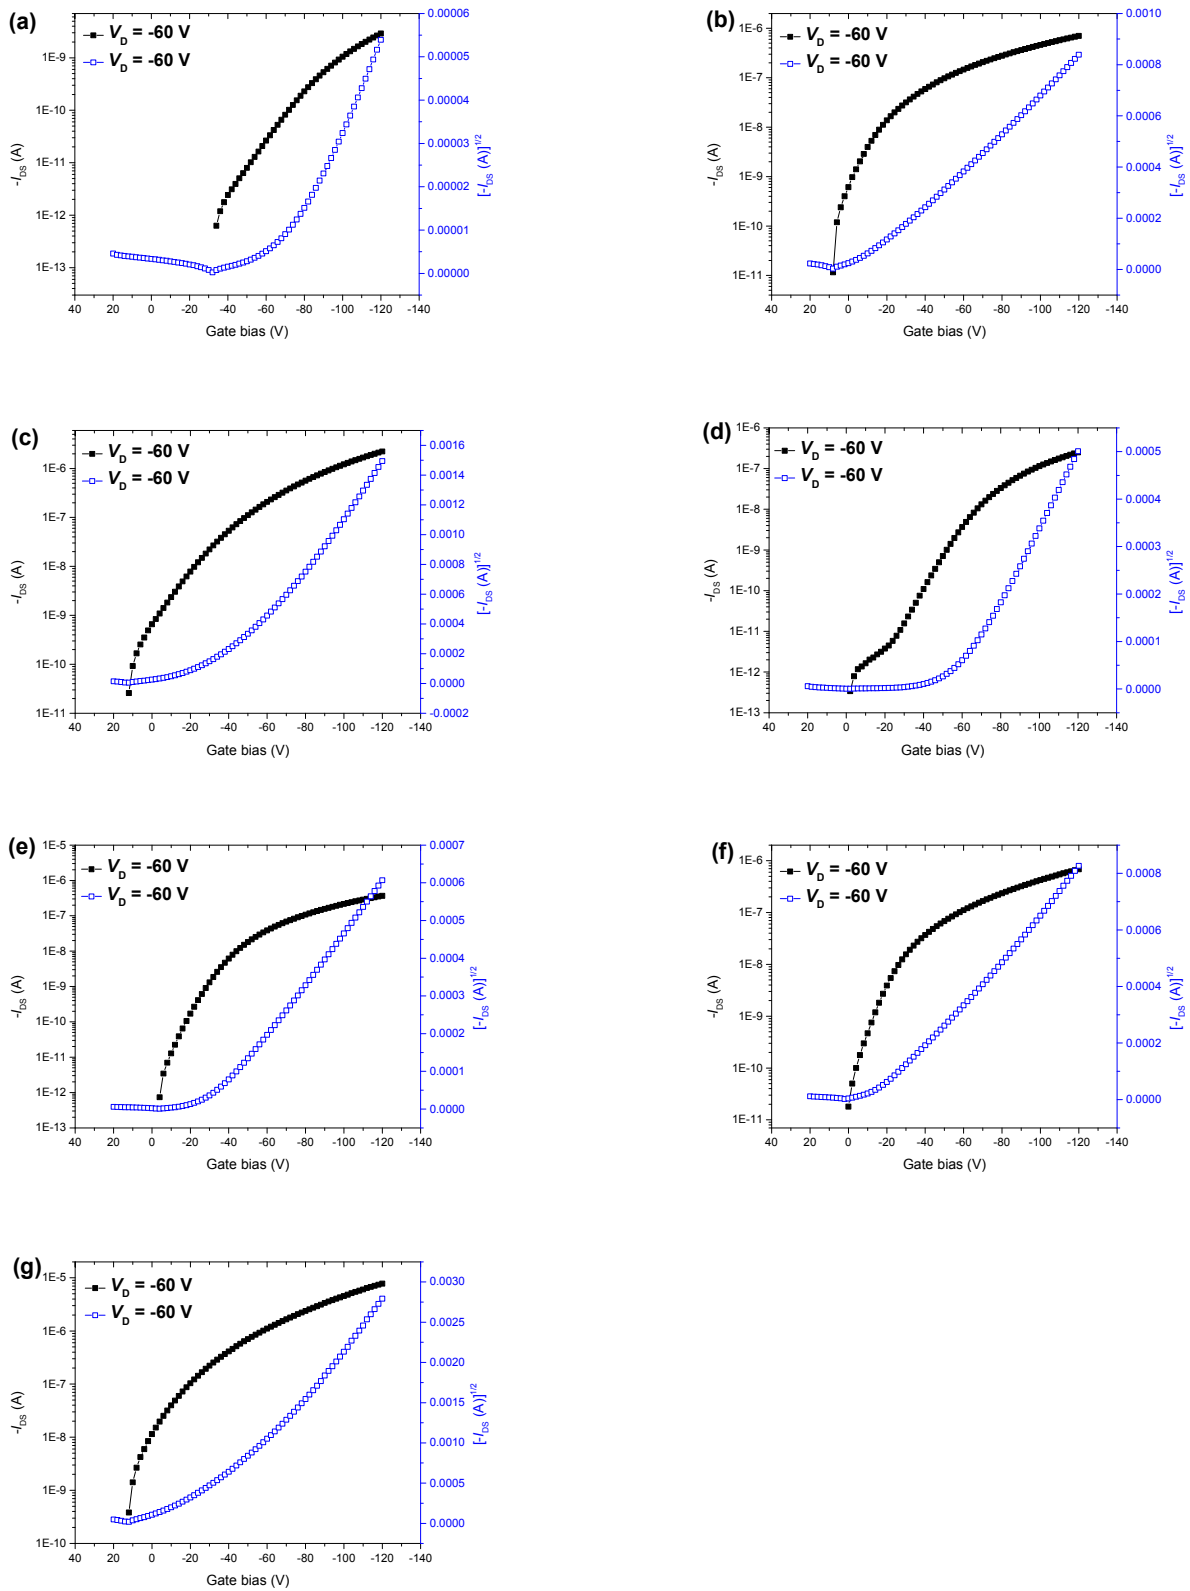

**Fig. S5** Transfer characteristics of FETs made from BDT-BT-C40 (a), BDT-BT-C32 (b), BDT-BT-C24 (c), BDT-FBT-C40 (d), BDT-FBT-C32 (e), BDT-FBT-C24 (f), and BDT-FBT-C20 (g).

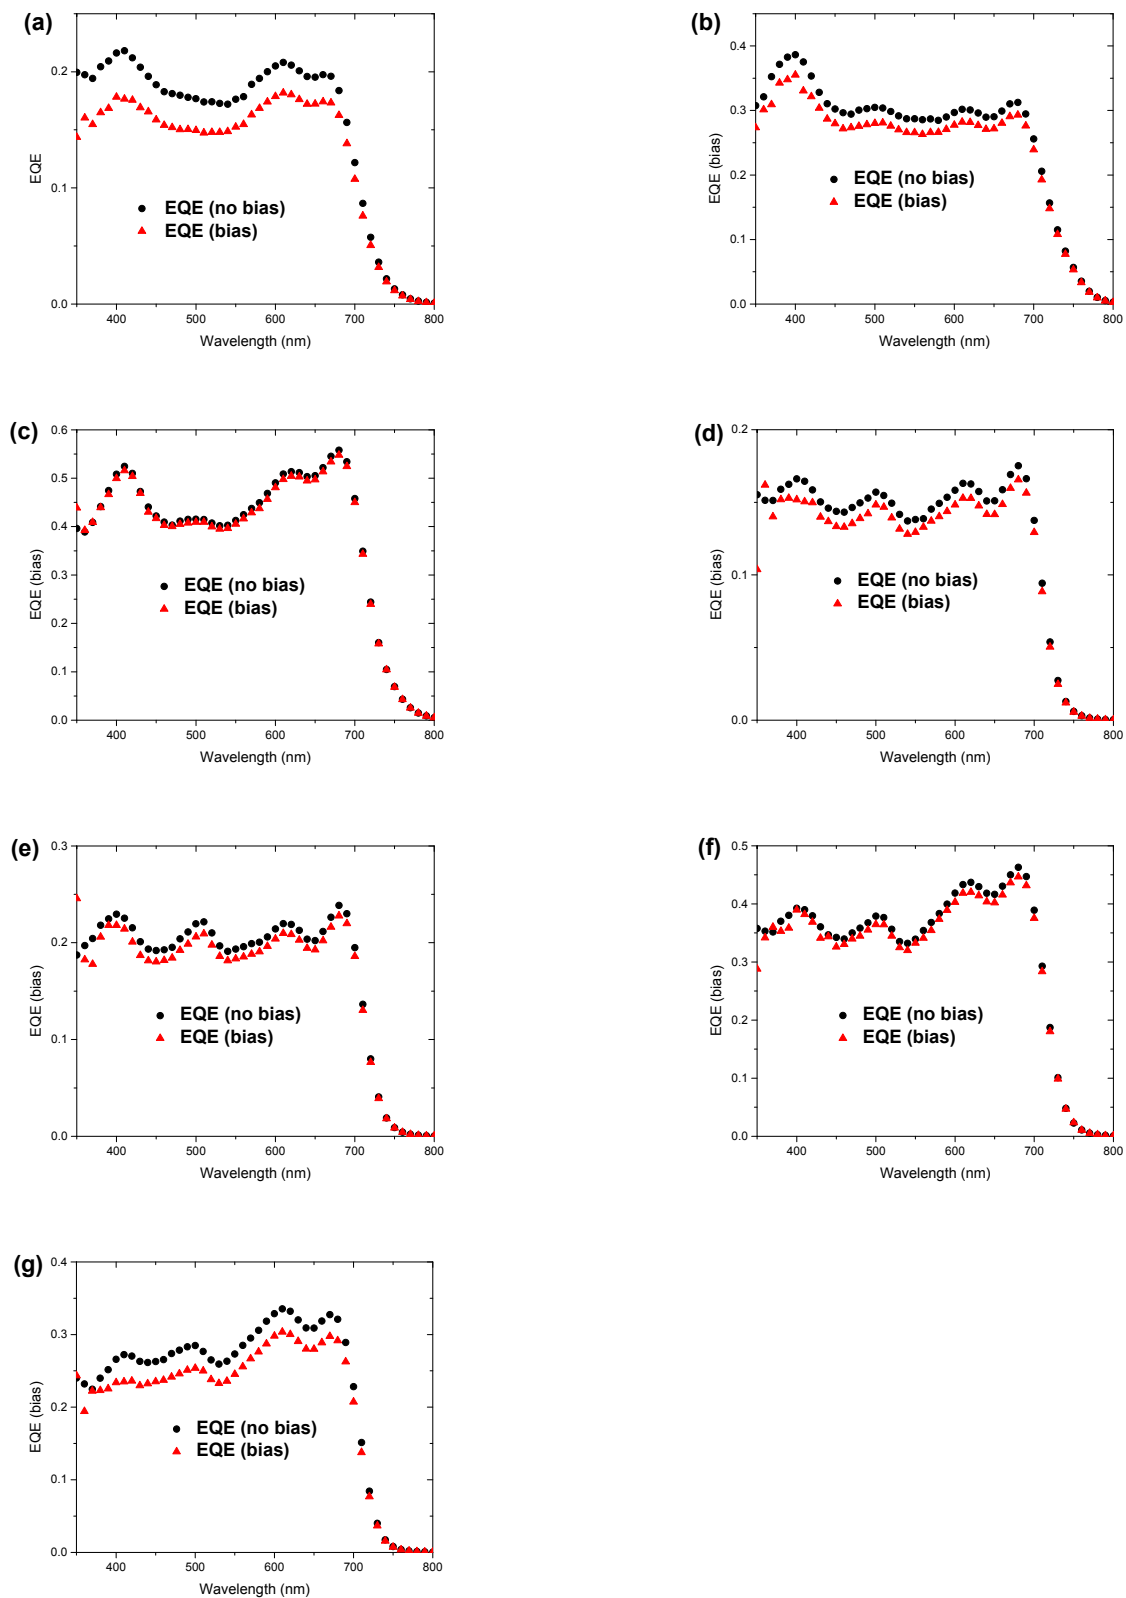

**Fig. S6** EQEs measured with and without optical bias of the polymer:[60]PCBM solar cells based on BDT-BT-C40 (a), BDT-BT-C32 (b), BDT-BT-C24 (c), BDT-FBT-C40 (d), BDT-FBT-C32 (e), BDT-FBT-C24 (f), and BDT-FBT-C20 (g).

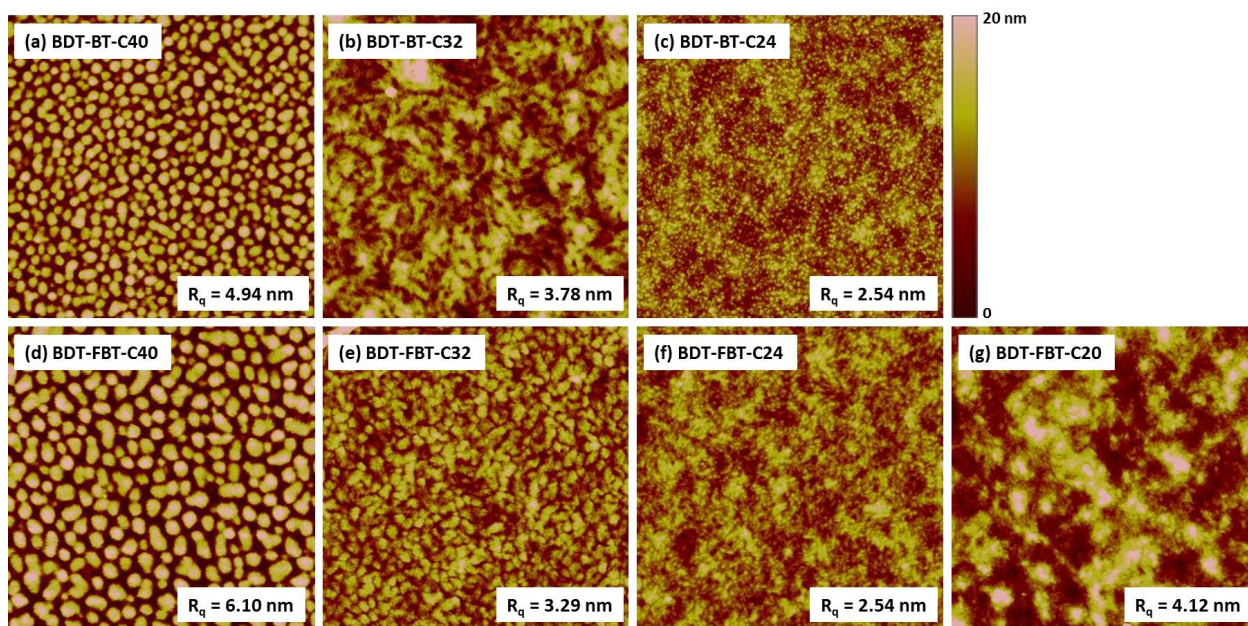

**Fig. S7** AFM height images ( $5 \times 5 \mu\text{m}^2$ , vertical scale 20 nm) of the polymer:[60]PCBM blend films spin-coated from CB for BDT-BT-C40 (a), BDT-BT-C32 (b), BDT-BT-C24 (c), BDT-FBT-C40 (d), BDT-FBT-C32 (e), BDT-FBT-C24 (f), and BDT-FBT-C20 (g). The root mean square roughness ( $R_q$ ) of these films is 4.94, 3.78, 2.54, 6.10, 3.29, 2.54, and 4.12 nm from (a) to (g).

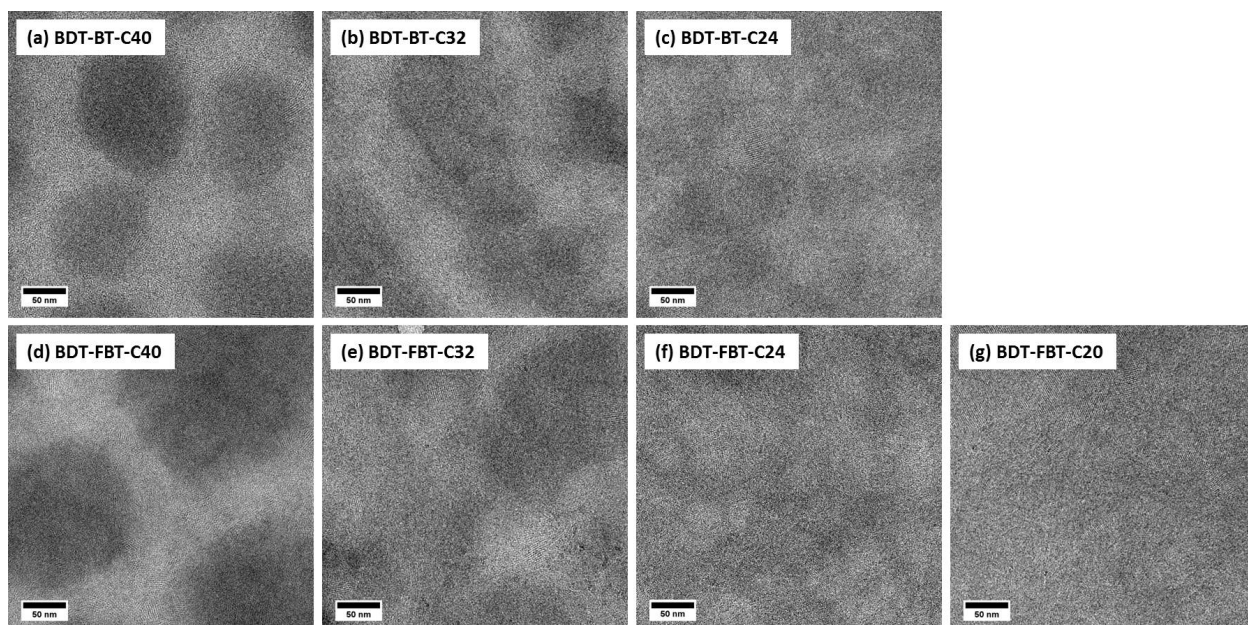

**Fig. S8** Bright field TEM images of the polymer:[60]PCBM blend films spin-coated from CB for BDT-BT-C40 (a), BDT-BT-C32 (b), BDT-BT-C24 (c), BDT-FBT-C40 (d), BDT-FBT-C32 (e), BDT-FBT-C24 (f), and BDT-FBT-C20 (g). Image size:  $350 \times 350 \text{ nm}^2$ ; scale bar: 50 nm.

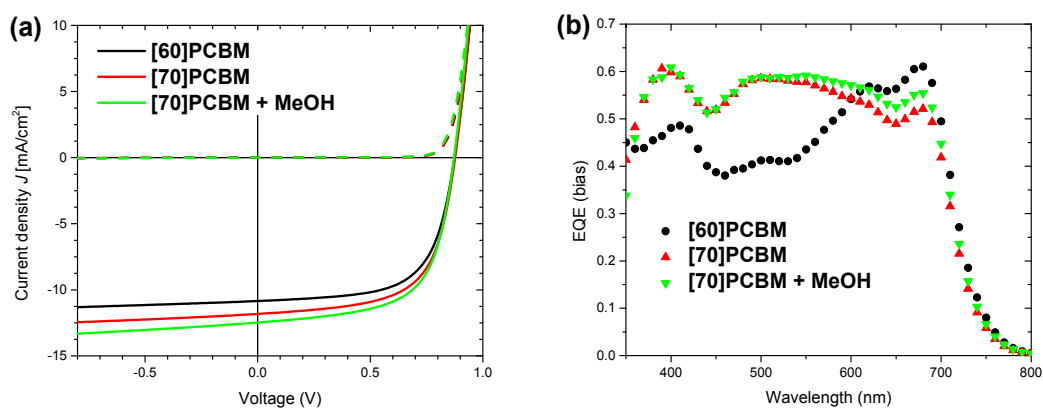

**Fig. S9** Current density – voltage characteristics of the solar cells based on BDT-BT-C24 processed from CB (2.5% DIO) under AM1.5G illumination ( $100 \text{ mW cm}^{-2}$ ); (b) EQE curves of the corresponding solar cells.

**Table S3** Performance parameters of the solar cells based on BDT-BT-C24 processed from CB (2.5% DIO) under AM1.5G illumination ( $100 \text{ mW cm}^{-2}$ ). The device structure is ITO/PEDOT:PSS/BDT-BT-C24:fullerene/PFN/Al.

| Fullerene       | $J_{sc}$ (mA cm <sup>-2</sup> ) | $V_{oc}$ (V) | FF (-) | PCE (%) | EQE <sub>max</sub> (-) |
|-----------------|---------------------------------|--------------|--------|---------|------------------------|
| [60]PCBM        | 10.9                            | 0.87         | 0.64   | 6.1     | 0.61                   |
| [70]PCBM        | 11.8                            | 0.88         | 0.63   | 6.5     | 0.61                   |
| [70]PCBM + MeOH | 12.3                            | 0.87         | 0.63   | 6.8     | 0.61                   |
